# Supplementary material for: Application of Near-Infrared Reflectance Spectroscopy for Predicting Damage Severity in a Diverse Panel of Tectona grandis Caused by Ceratocystis fimbriata
Source: MDPI journal article supplement (doi:10.3390/plants12142734), 2023-07-23
Supplement: s1 [file s1]

# Supplementary Material

**Table S1.** Spectral Reflectance Indices (SRIs) calculated in teak (*Tectona grandis*) clones.

| SRI         | Name                                          | Formula                                                    | Reference |
|-------------|-----------------------------------------------|------------------------------------------------------------|-----------|
| CAI         | Cellulose absorption Index                    | $100 \times (0.5 \times (R_{2030} + R_{2210}) - R_{2100})$ | 40        |
| CAI         | Cellulose absorption Index 2                  | $0.5 \times (R_{2020} + R_{2220}) - R_{2100}$              | 41        |
| DAI         | Difference 1725/970 Difference LAI            | $R_{1725} - R_{970}$                                       | 42        |
| NDWI-Hyp    | Normalized Difference 1070/1200 NDWI-Hyperion | $\frac{R_{1070} - R_{1200}}{R_{1070} + R_{1200}}$          | 43        |
| ND1080/1180 | Normalized Difference 1080/1180               | $\frac{R_{1080} - R_{1180}}{R_{1080} + R_{1180}}$          | 44        |
| ND1080/1260 | Normalized Difference 1080/1260               | $\frac{R_{1080} - R_{1260}}{R_{1080} + R_{1260}}$          | 44        |
| ND1080/1450 | Normalized Difference 1080/1450               | $\frac{R_{1080} - R_{1450}}{R_{1080} + R_{1450}}$          | 44        |
| ND1080/1675 | Normalized Difference 1080/1675               | $\frac{R_{1080} - R_{1675}}{R_{1080} + R_{1675}}$          | 44        |
| ND1080/1260 | Normalized Difference 1080/2170               | $\frac{R_{1080} - R_{2170}}{R_{1080} + R_{2170}}$          | 44        |
| LWVI2       | Difference 1094/ 1205 Leaf water VI 2         | $\frac{R_{1094} - R_{1205}}{R_{1094} + R_{1205}}$          | 45        |
| ND1180/1450 | Normalized Difference 1080/1450               | $\frac{R_{1080} - R_{1450}}{R_{1080} + R_{1450}}$          | 44        |
| ND1180/1675 | Normalized Difference 1080/1675               | $\frac{R_{1080} - R_{1675}}{R_{1080} + R_{1675}}$          | 44        |
| ND1180/2170 | Normalized Difference 1080/2170               | $\frac{R_{1080} - R_{2170}}{R_{1080} + R_{2170}}$          | 44        |
| ND1260/1450 | Normalized Difference 1260/1450               | $\frac{R_{1260} - R_{1450}}{R_{1260} + R_{1450}}$          | 44        |
| ND1260/1675 | Normalized Difference 1260/1675               | $\frac{R_{1260} - R_{1675}}{R_{1260} + R_{1675}}$          | 44        |
| ND1260/2170 | Normalized Difference 1260/2170               | $\frac{R_{1260} - R_{1675}}{R_{1260} + R_{2170}}$          | 44        |
| NDBleaf     | Normalized Difference leaf canopy biomass     | $\frac{R_{2160} - R_{1540}}{R_{2160} + R_{1540}}$          | 46        |
| NDlma       | Normalized Difference leaf mass per area      | $\frac{R_{2260} - R_{1490}}{R_{2260} + R_{1490}}$          | 42        |
| ND960/1180  | Normalized Difference 960/1180                | $\frac{R_{960} - R_{1180}}{R_{960} + R_{1180}}$            | 44        |
| ND960/1260  | Normalized Difference 960/1260                | $\frac{R_{960} - R_{1260}}{R_{960} + R_{1260}}$            | 44        |

|             |                                                       |                                                                                                                   |    |
|-------------|-------------------------------------------------------|-------------------------------------------------------------------------------------------------------------------|----|
| ND960/1450  | Normalized Difference<br>960/1450                     | $\frac{R_{960} - R_{1450}}{R_{960} + R_{1450}}$                                                                   | 44 |
| ND960/1675  | Normalized Difference<br>960/1675                     | $\frac{R_{960} - R_{1675}}{R_{960} + R_{1675}}$                                                                   | 44 |
| ND960/2170  | Normalized Difference<br>960/2170                     | $\frac{R_{960} - R_{2170}}{R_{960} + R_{2170}}$                                                                   | 44 |
| NDLI        | Normalized Difference Lignin<br>Index                 | $\frac{\log(\frac{1}{R_{1754}}) - \log(\frac{1}{R_{1680}})}{\log(\frac{1}{R_{1754}}) + \log(\frac{1}{R_{1680}})}$ | 47 |
| NDNI        | Normalized Difference<br>Nitrogen Index               | $\frac{\log(\frac{1}{R_{1510}}) - \log(\frac{1}{R_{1680}})}{\log(\frac{1}{R_{1510}}) + \log(\frac{1}{R_{1680}})}$ | 47 |
| RVlhyp      | Simple Ratio 1058/1148                                | $\frac{R_{1058}}{R_{1148}}$                                                                                       | 48 |
| SR1080/1180 | Simple Ratio 1080/1180                                | $\frac{R_{1080}}{R_{1180}}$                                                                                       | 44 |
| SR1080/1260 | Simple Ratio 1080/1260                                | $\frac{R_{1080}}{R_{1260}}$                                                                                       | 44 |
| SR1080/1450 | Simple Ratio 1080/1450                                | $\frac{R_{1080}}{R_{1450}}$                                                                                       | 44 |
| SR1080/1675 | Simple Ratio 1080/1675                                | $\frac{R_{1080}}{R_{1675}}$                                                                                       | 44 |
| SR1080/2170 | Simple Ratio 1080/2170                                | $\frac{R_{1080}}{R_{2170}}$                                                                                       | 44 |
| SR1180/1080 | Simple Ratio 1180/1080                                | $\frac{R_{1180}}{R_{1080}}$                                                                                       | 44 |
| SR1180/1450 | Simple Ratio 1180/1450                                | $\frac{R_{1180}}{R_{1450}}$                                                                                       | 44 |
| SR1180/1675 | Simple Ratio 1180/1675                                | $\frac{R_{1180}}{R_{1675}}$                                                                                       | 44 |
| SR1180/2170 | Simple Ratio 1180/2170                                | $\frac{R_{1180}}{R_{2170}}$                                                                                       | 44 |
| WC          | Simple Ratio 1193/1126 Water<br>content               | $\frac{R_{1193}}{R_{1126}}$                                                                                       | 49 |
| LAIDI       | Simple Ratio 1250/1050 Leaf<br>area determining index | $\frac{R_{1250}}{R_{1050}}$                                                                                       | 42 |
| SR1260/1080 | Simple Ratio 1260/1080                                | $\frac{R_{1260}}{R_{1080}}$                                                                                       | 44 |
| SR1260/1450 | Simple Ratio 1260/1450                                | $\frac{R_{1260}}{R_{1450}}$                                                                                       | 44 |
| SR1260/1675 | Simple Ratio 1260/1675                                | $\frac{R_{1260}}{R_{1675}}$                                                                                       | 44 |
| SR1260/2170 | Simple Ratio 1260/2170                                | $\frac{R_{1260}}{R_{2170}}$                                                                                       | 44 |
| SR1450/1080 | Simple Ratio 1450/1080                                | $\frac{R_{1450}}{R_{1080}}$                                                                                       | 44 |
| SR1450/1180 | Simple Ratio 1450/1180                                | $\frac{R_{1450}}{R_{1180}}$                                                                                       | 44 |
| SR1450/1260 | Simple Ratio 1450/1260                                | $\frac{R_{1450}}{R_{1260}}$                                                                                       | 44 |

|                     |                                                                |                             |    |
|---------------------|----------------------------------------------------------------|-----------------------------|----|
| SR1450/960          | Simple Ratio 1450/960                                          | $\frac{R_{1450}}{R_{960}}$  | 44 |
| TM5/TM7             | Simple Ratio 1650/2218                                         | $\frac{R_{1650}}{R_{2218}}$ | 50 |
| SR1675/1080         | Simple Ratio 1675/1080                                         | $\frac{R_{1675}}{R_{1080}}$ | 44 |
| SR1675/1180         | Simple Ratio 1675/1180                                         | $\frac{R_{1675}}{R_{1180}}$ | 44 |
| SR1675/1260         | Simple Ratio 1675/1260                                         | $\frac{R_{1675}}{R_{1260}}$ | 44 |
| SR1675/960          | Simple Ratio 1675/960                                          | $\frac{R_{1675}}{R_{960}}$  | 44 |
| SR2170/1080         | Simple Ratio 2170/1080                                         | $\frac{R_{2170}}{R_{1080}}$ | 44 |
| SR2170/1180         | Simple Ratio 2170/1180                                         | $\frac{R_{2170}}{R_{1180}}$ | 44 |
| SR2170/1260         | Simple Ratio 2170/1260                                         | $\frac{R_{2170}}{R_{1260}}$ | 44 |
| SR2170/960          | Simple Ratio 2170/960                                          | $\frac{R_{2170}}{R_{960}}$  | 44 |
| WBI3                | Simple Ratio 950/900 Water<br>band index                       | $\frac{R_{950}}{R_{900}}$   | 51 |
| WBI4                | Simple Ratio 895/972 Water<br>band index 4                     | $\frac{R_{895}}{R_{972}}$   | 52 |
| SR960/1180          | Simple Ratio 960/1180                                          | $\frac{R_{960}}{R_{1180}}$  | 44 |
| SR960/1260          | Simple Ratio 960/1260                                          | $\frac{R_{960}}{R_{1260}}$  | 44 |
| SR960/1450          | Simple Ratio 960/1450                                          | $\frac{R_{960}}{R_{1450}}$  | 44 |
| SR960/1675          | Simple Ratio 960/1675                                          | $\frac{R_{960}}{R_{1675}}$  | 44 |
| SR960/2170          | Simple Ratio 960/2170                                          | $\frac{R_{960}}{R_{2170}}$  | 44 |
| PWI                 | Plant Water Index, Water Band<br>Index (WBI), Water Index (WI) | $\frac{R_{970}}{R_{900}}$   | 53 |
| WBI                 | Simple Ratio 970/902 Water<br>band index                       | $\frac{R_{970}}{R_{902}}$   | 54 |
| Single Band<br>1020 | SB1020                                                         | $R_{1020}$                  | 55 |
| Single Band<br>1040 | SB1040                                                         | $R_{1040}$                  | 55 |
| Single Band<br>1120 | SB1120                                                         | $R_{1120}$                  | 55 |
| Single Band<br>1200 | SB1200                                                         | $R_{1200}$                  | 55 |
| Single Band<br>1400 | SB1400                                                         | $R_{1400}$                  | 55 |
| Single Band<br>1420 | SB1420                                                         | $R_{1420}$                  | 55 |

|                     |        |            |    |
|---------------------|--------|------------|----|
| Single Band<br>1450 | SB1450 | $R_{1450}$ | 55 |
| Single Band<br>1490 | SB1490 | $R_{1490}$ | 55 |
| Single Band<br>1510 | SB1510 | $R_{1510}$ | 55 |
| Single Band<br>1530 | SB1530 | $R_{1530}$ | 55 |
| Single Band<br>1540 | SB1540 | $R_{1540}$ | 55 |
| Single Band<br>1580 | SB1580 | $R_{1580}$ | 55 |
| Single Band<br>1690 | SB1690 | $R_{1690}$ | 55 |
| Single Band<br>1780 | SB1780 | $R_{1780}$ | 55 |
| Single Band<br>1788 | SB1788 | $R_{1788}$ | 55 |
| Single Band<br>1820 | SB1820 | $R_{1820}$ | 55 |
| Single Band<br>1900 | SB1900 | $R_{1900}$ | 55 |
| Single Band<br>1940 | SB1940 | $R_{1940}$ | 55 |
| Single Band<br>1960 | SB1960 | $R_{1960}$ | 55 |
| Single Band<br>1980 | SB1980 | $R_{1980}$ | 55 |
| Single Band<br>2000 | SB2000 | $R_{2000}$ | 55 |
| Single Band<br>2060 | SB2060 | $R_{2060}$ | 55 |
| Single Band<br>2080 | SB2080 | $R_{2080}$ | 55 |
| Single Band<br>2100 | SB2100 | $R_{2100}$ | 55 |
| Single Band<br>2130 | SB2130 | $R_{2130}$ | 55 |
| Single Band<br>2180 | SB2180 | $R_{2180}$ | 55 |
| Single Band<br>2218 | SB2218 | $R_{2218}$ | 55 |
| Single Band<br>2240 | SB2240 | $R_{2240}$ | 55 |

|                     |                                          |                                                                           |    |
|---------------------|------------------------------------------|---------------------------------------------------------------------------|----|
| Single Band<br>2250 | SB2250                                   | $R_{2250}$                                                                | 55 |
| Single Band<br>2270 | SB2270                                   | $R_{2270}$                                                                | 55 |
| Single Band<br>2280 | SB2280                                   | $R_{2280}$                                                                | 55 |
| Single Band<br>2300 | SB2300                                   | $R_{2300}$                                                                | 55 |
| Single Band<br>2310 | SB2310                                   | $R_{2310}$                                                                | 55 |
| Single Band<br>2320 | SB2320                                   | $R_{2320}$                                                                | 55 |
| Single Band<br>2340 | SB2340                                   | $R_{2340}$                                                                | 55 |
| Single Band<br>2350 | SB2350                                   | $R_{2350}$                                                                | 55 |
| Single Band 910     | SB910                                    | $R_{910}$                                                                 | 55 |
| Single Band 930     | SB930                                    | $R_{930}$                                                                 | 55 |
| Single Band 970     | SB970                                    | $R_{970}$                                                                 | 55 |
| Single Band 990     | SB990                                    | $R_{990}$                                                                 | 55 |
| sLAIDI              | sLAIDI                                   | $S \frac{R_{1050} - R_{1250}}{R_{1050} + R_{1250}}$                       | 56 |
| SWIRFI              | Clay index, SWIR Fine<br>particles Index | $R_{2209}^3 \times \frac{R_{2133}^2}{R_{2225}}$                           | 57 |
| SWIRVI              | Shortwave-infrared                       | $37.72 \times (R_{2210} - R_{2090}) + 26.27 (R_{2280} - R_{2090}) + 0.57$ | 58 |
| SWIRLI              | Shortwave-infrared                       | $3.87 \times (R_{2210} - R_{2090}) - 27.51 (R_{2280} - R_{2090}) - 0.2$   | 58 |
| SWIRSI              | Shortwave-infrared                       | $-41.59 \times (R_{2210} - R_{2090}) + 1.24 (R_{2280} - R_{2090}) + 0.64$ | 58 |
